# Supplementary material for: Structural characterization of gas-phase cysteine and cysteine methyl ester complexes with zinc and cadmium dications by infrared multiple photon dissociation spectroscopy
Source: Royal Society of Chemistry journal article supplement (doi:10.1039/c5cp01500f), 2015-01-01
Supplement: c5cp01500f1.pdf [file c5cp01500f1.pdf]

**Supplementary Information for:**

“Structural Characterization of Gas-Phase Cysteine and Cysteine Methyl Ester Complexes with Zinc and Cadmium Dications by Infrared Multiple Photon Dissociation Spectroscopy”

by Rebecca A. Coates, Christopher P. McNary, Georgia C. Boles, Giel Berden, Jos Oomens, and P.B. Armentrout

**Table S1.** Relative enthalpy at 0 K ( $\Delta H_0$ ) and free energies ( $\Delta G_{298}$ )<sup>a</sup> (kJ/mol) at 298 K of metal cationized (Cys-H), (CysOMe-H), and CysOMe Conformers<sup>b</sup>

| Complex                  | Structure                                          | B3LYP |         | B3P86 |         | MP2(full) |         |
|--------------------------|----------------------------------------------------|-------|---------|-------|---------|-----------|---------|
| [Zn(Cys-H)] <sup>+</sup> | [N,CO,S <sup>-</sup> ]tgg                          | 0.0   | (0.0)   | 0.0   | (0.0)   | 0.0       | (0.0)   |
|                          | [N,CO,S <sup>-</sup> ]cgg                          | 24.1  | (26.6)  | 23.6  | (26.2)  | 22.9      | (25.4)  |
|                          | [CO,S <sup>-</sup> ]cgg                            | 30.0  | (31.4)  | 33.7  | (35.1)  | 47.2      | (48.7)  |
|                          | [N,S <sup>-</sup> ]tgt                             | 33.8  | (37.1)  | 40.6  | (44.0)  | 41.0      | (44.3)  |
|                          | [CO <sup>-</sup> ,S <sup>-</sup> ]cgg <sup>c</sup> | 39.4  | (40.0)  | 43.9  | (44.5)  | 45.4      | (46.0)  |
|                          | [N,OH,S <sup>-</sup> ]tgg                          | 40.8  | (41.4)  | 44.8  | (45.4)  | 37.8      | (38.4)  |
|                          | [CO,S <sup>-</sup> ]ctg                            | 53.0  | (53.6)  | 57.3  | (58.0)  | 71.2      | (71.8)  |
|                          | [N,CO <sup>-</sup> ,S]ggg <sup>+</sup>             | 61.4  | (62.1)  | 61.6  | (62.3)  | 58.9      | (59.6)  |
|                          | [N,S <sup>-</sup> ]cgt                             | 66.7  | (70.3)  | 73.1  | (76.6)  | 74.4      | (78.0)  |
|                          | [N,CO <sup>-</sup> ,S]ggg <sup>-</sup>             | 67.1  | (67.4)  | 68.1  | (68.3)  | 66.2      | (66.5)  |
|                          | [N <sup>-</sup> ,CO,S]cggg <sup>+</sup>            | 99.3  | (102.2) | 100.4 | (103.3) | 101.3     | (104.2) |
|                          | [N <sup>-</sup> ,CO,S]tggg                         | 100.6 | (103.6) | 101.6 | (104.6) | 102.9     | (105.9) |
|                          | [N <sup>-</sup> ,CO,S]cggg <sup>-</sup>            | 121.4 | (124.4) | 121.6 | (124.7) | 122.8     | (125.9) |
|                          | [CO <sub>2</sub> <sup>-</sup> ,S]gcg               | 140.5 | (142.7) | 144.6 | (146.8) | 155.7     | (158.0) |
|                          | [N,CO <sup>-</sup> ]cgg                            | 141.4 | (142.3) | 150.0 | (150.9) | 145.0     | (145.9) |
|                          | [N,CO <sup>-</sup> ]gtg                            | 145.1 | (146.3) | 154.6 | (155.8) | 152.6     | (153.8) |
|                          | [N,CO <sup>-</sup> ]tg <sup>-</sup> g              | 147.4 | (148.8) | 156.3 | (157.7) | 153.0     | (154.4) |
|                          | [S <sup>-</sup> ]tgg                               | 150.6 | (155.3) | 171.1 | (175.8) | 186.7     | (191.4) |
|                          | [N,CO <sup>-</sup> ]gtt                            | 151.4 | (153.0) | 161.2 | (162.8) | 159.3     | (160.9) |
|                          | [CO <sup>-</sup> ,S]ggg                            | 157.7 | (160.8) | 168.5 | (171.6) | 178.6     | (181.7) |
|                          | [S <sup>-</sup> ]ttc                               | 163.6 | (169.4) | 185.8 | (191.7) | 217.0     | (222.8) |
|                          | [N,CO <sup>-</sup> ]tg <sup>+</sup> g              | 166.4 | (170.4) | 179.4 | (183.3) | 176.7     | (180.6) |
|                          | [N <sup>-</sup> ,CO]tcgg                           | 170.7 | (175.4) | 182.2 | (186.9) | 182.6     | (187.3) |
|                          | [CO <sub>2</sub> <sup>-</sup> ]gtg <sup>+</sup>    | 177.1 | (181.2) | 199.5 | (203.5) | 249.8     | (253.8) |
|                          | [CO <sub>2</sub> <sup>-</sup> ]ggg                 | 179.7 | (184.5) | 201.4 | (206.2) | 241.0     | (245.8) |
|                          | [N <sup>-</sup> ,CO]cctt                           | 181.6 | (186.3) | 191.4 | (196.1) | 190.0     | (194.7) |
|                          | [CO <sub>2</sub> <sup>-</sup> ]gtg <sup>-</sup>    | 181.8 | (187.2) | 204.6 | (210.0) | 255.0     | (260.4) |

| Complex                  | Structure                                          | B3LYP |         | B3P86 |         | MP2(full) |         |
|--------------------------|----------------------------------------------------|-------|---------|-------|---------|-----------|---------|
| [Zn(Cys-H)] <sup>+</sup> | [N <sup>-</sup> ,S]cttg                            | 191.5 | (196.6) | 200.6 | (205.8) | 203.0     | (208.1) |
|                          | [N,CO,CH]tgt                                       | 239.8 | (242.9) | 251.5 | (254.7) | 303.9     | (307.0) |
|                          | [N,CO]tgt                                          | 241.0 | (242.2) | 258.1 | (259.3) | 343.4     | (344.5) |
|                          | [N,CO]tgg                                          | 242.1 | (243.1) | 259.5 | (260.4) | 344.9     | (345.9) |
|                          | [CO <sub>2</sub> <sup>-</sup> ]gt <sup>c</sup>     | 271.1 | (249.1) | 291.7 | (269.7) | 396.0     | (374.0) |
| [Cd(Cys-H)] <sup>+</sup> | [N,CO,S <sup>-</sup> ]tgg                          | 0.0   | (0.0)   | 0.0   | (0.0)   | 0.0       | (0.0)   |
|                          | [N,CO,S <sup>-</sup> ]cgg                          | 25.1  | (25.3)  | 24.6  | (24.8)  | 25.9      | (26.0)  |
|                          | [N,S <sup>-</sup> ]tgt                             | 26.0  | (26.6)  | 31.0  | (31.6)  | 35.9      | (36.5)  |
|                          | [CO,S <sup>-</sup> ]cgg                            | 29.4  | (30.0)  | 31.5  | (32.0)  | 45.7      | (46.3)  |
|                          | [N,OH,S <sup>-</sup> ]tgg                          | 34.0  | (34.6)  | 38.3  | (38.9)  | 34.4      | (34.9)  |
|                          | [CO,S <sup>-</sup> ]ctg                            | 42.8  | (43.0)  | 45.5  | (45.8)  | 59.2      | (59.4)  |
|                          | [CO <sup>-</sup> ,S <sup>-</sup> ]cgg <sup>c</sup> | 45.6  | (45.6)  | 46.9  | (47.0)  | 50.7      | (50.7)  |
|                          | [N,S <sup>-</sup> ]cgt                             | 58.4  | (59.2)  | 62.6  | (63.4)  | 68.2      | (69.0)  |
|                          | [N,CO <sup>-</sup> ,S]ggg <sup>+</sup>             | 81.8  | (81.6)  | 82.1  | (81.9)  | 84.0      | (83.8)  |
|                          | [S <sup>-</sup> ]tgg                               | 83.9  | (85.3)  | 98.4  | (99.8)  | 105.5     | (106.9) |
|                          | [N,CO <sup>-</sup> ,S]ggg <sup>-</sup>             | 87.9  | (88.0)  | 88.8  | (88.9)  | 91.8      | (91.9)  |
|                          | [S <sup>-</sup> ]ttc                               | 99.8  | (102.3) | 115.8 | (118.3) | 144.5     | (146.9) |
|                          | [N <sup>-</sup> ,CO,S]tggg                         | 105.3 | (105.8) | 107.4 | (107.9) | 113.4     | (113.9) |
|                          | [CO <sub>2</sub> <sup>-</sup> ,S]gcc               | 121.0 | (122.3) | 125.4 | (126.8) | 146.0     | (147.4) |
|                          | [N <sup>-</sup> ,CO,S]cggg                         | 128.2 | (128.8) | 129.4 | (130.0) | 135.3     | (135.9) |
|                          | [CO <sub>2</sub> <sup>-</sup> ]g <sup>+</sup> tg   | 129.9 | (133.8) | 151.5 | (155.4) | 227.9     | (231.8) |
|                          | [CO <sub>2</sub> <sup>-</sup> ]cgg                 | 130.8 | (134.4) | 150.9 | (154.4) | 224.6     | (228.2) |
|                          | [CO <sub>2</sub> <sup>-</sup> ]gg <sub>-</sub> g   | 132.1 | (135.7) | 152.1 | (155.8) | 224.2     | (227.8) |
|                          | [CO <sub>2</sub> <sup>-</sup> ]gtg                 | 132.9 | (137.9) | 155.7 | (160.7) | 232.4     | (237.3) |
|                          | [CO <sub>2</sub> <sup>-</sup> ]gg <sup>+</sup> g   | 140.0 | (143.9) | 160.8 | (164.8) | 236.9     | (240.8) |
|                          | [N,CO <sup>-</sup> ]tgg <sup>+</sup>               | 149.4 | (149.9) | 156.7 | (157.1) | 163.0     | (163.5) |
|                          | [N,CO <sup>-</sup> ]tgg <sup>-</sup>               | 155.9 | (156.9) | 163.4 | (164.4) | 171.5     | (172.5) |
|                          | [N,CO <sup>-</sup> ]gtt                            | 156.6 | (158.0) | 164.8 | (166.2) | 174.8     | (176.2) |

| Complex                     | Structure                                       | B3LYP   |         | B3P86   |         | MP2(full) |         |
|-----------------------------|-------------------------------------------------|---------|---------|---------|---------|-----------|---------|
| [Cd(Cys-H)] <sup>+</sup>    | [CO <sup>-</sup> ,S]ggt                         | 160.2   | (162.6) | 167.8   | (170.2) | 187.9     | (190.2) |
|                             | [CO <sub>2</sub> <sup>-</sup> ,S]ggg            | 164.2   | (166.4) | 171.8   | (174.0) | 193.3     | (195.5) |
|                             | [N <sup>-</sup> ,CO]tcgg                        | 166.4   | (168.2) | 179.8   | (181.6) | 198.8     | (200.6) |
|                             | [N,CO <sub>2</sub> <sup>-</sup> ]tgg            | 166.5   | (167.5) | 178.6   | (179.6) | 197.0     | (198.0) |
|                             | [N <sup>-</sup> ,CO]cctt                        | 181.4   | (184.2) | 191.2   | (194.0) | 200.5     | (203.3) |
|                             | [N <sup>-</sup> ,S]cttg                         | 184.6   | (186.8) | 193.1   | (195.2) | 207.8     | (209.9) |
|                             | [N,CO,CH]tgt                                    | 199.8   | (200.4) | 214.3   | (214.9) | 259.3     | (259.9) |
|                             | [CO <sub>2</sub> <sup>-</sup> ]ggt <sup>c</sup> | 200.1   | (201.8) | 218.5   | (220.2) | 302.5     | (304.1) |
|                             | [N,CO]tgg                                       | 204.1   | (204.9) | 221.6   | (222.4) | 289.9     | (290.7) |
|                             | [N,CO]tcg                                       | 235.9   | (238.3) | 261.2   | (263.6) | 164.4     | (166.8) |
|                             | [CO,S]ttgt                                      | 285.4   | (287.2) | 300.9   | (302.7) | 385.2     | (387.0) |
| [Zn(CysOMe-H)] <sup>+</sup> | [N,CO,S <sup>-</sup> ]tgg                       | 0.0     | (0.0)   | 0.0     | (0.0)   | 0.0       | (0.0)   |
|                             | [N,CO,S <sup>-</sup> ]cgg                       | 35.8    | (35.9)  | 34.8    | (34.8)  | 35.8      | (35.8)  |
|                             | [N,S <sup>-</sup> ]tgt                          | 40.3    | (41.2)  | 46.7    | (47.6)  | 49.9      | (50.8)  |
|                             | [N,OMe,S <sup>-</sup> ]tgg                      | 44.4    | (44.8)  | 46.9    | (47.4)  | 37.9      | (38.3)  |
|                             | [CO,S <sup>-</sup> ]tgg                         | 58.9    | (60.7)  | 67.3    | (69.2)  | 77.5      | (79.3)  |
|                             | [CO,S <sup>-</sup> ]ct.g                        | 78.4    | (79.7)  | 85.0    | (86.2)  | 95.0      | (96.3)  |
|                             | [N,S <sup>-</sup> ]cgt                          | 86.7    | (87.4)  | 91.9    | (92.6)  | 95.2      | (95.9)  |
|                             | [CO,S <sup>-</sup> ]ct.g                        | 87.7    | (89.1)  | 95.2    | (96.5)  | 106.5     | (107.8) |
|                             | [N <sup>-</sup> ,CO,S]tggg                      | 102.7   | (103.2) | 103.6   | (104.2) | 106.2     | (106.8) |
|                             | [N <sup>-</sup> ,OMe,S]tggg                     | 153.1   | (154.2) | 157.2   | (158.3) | 151.8     | (152.9) |
|                             | [N,CO]tgt                                       | 240.8   | (242.1) | 257.8   | (259.0) | 340.4     | (341.7) |
| [N,CO]tcg                   | 241.3                                           | (242.1) | 258.3   | (259.2) | 338.8   | (339.7)   |         |
| [Cd(CysOMe-H)] <sup>+</sup> | [N,CO,S <sup>-</sup> ]tgg                       | 0.0     | (0.0)   | 0.0     | (0.0)   | 0.0       | (0.0)   |
|                             | [N,S <sup>-</sup> ]tgt                          | 30.0    | (30.6)  | 34.5    | (35.1)  | 40.2      | (40.9)  |
|                             | [N,CO,S <sup>-</sup> ]cgg                       | 37.4    | (37.5)  | 36.3    | (36.4)  | 37.8      | (37.9)  |
|                             | [N,OMe,S <sup>-</sup> ]tgg                      | 38.4    | (38.8)  | 41.3    | (41.6)  | 35.0      | (35.3)  |
|                             | [CO,S <sup>-</sup> ]tgg                         | 53.9    | (55.4)  | 60.5    | (62.0)  | 73.2      | (74.7)  |

| Complex                     | Structure                             | B3LYP         | B3P86         | MP2(full)     |
|-----------------------------|---------------------------------------|---------------|---------------|---------------|
| [Cd(CysOMe-H)] <sup>+</sup> | [CO,S <sup>-</sup> ]ct <sub>-</sub> g | 74.0 (75.1)   | 78.7 (79.8)   | 92.2 (93.3)   |
|                             | [N,S <sup>-</sup> ]cgt                | 75.2 (75.6)   | 78.3 (78.7)   | 84.1 (84.6)   |
|                             | [CO,S <sup>-</sup> ]ct <sub>+</sub> g | 78.9 (80.2)   | 84.9 (86.2)   | 100.3 (101.5) |
|                             | [N <sup>-</sup> ,CO,S]tggg            | 104.6 (105.0) | 106.7 (107.1) | 112.9 (113.3) |
|                             | [N <sup>-</sup> ,OMe,S]tggg           | 145.8 (146.9) | 151.4 (152.5) | 153.6 (154.8) |
|                             | [N,CO]tgt                             | 201.5 (202.6) | 218.3 (219.4) | 289.7 (290.8) |
|                             | [N,CO] tgg                            | 203.7 (204.4) | 220.8 (221.5) | 291.0 (291.7) |
| CdCl <sup>+</sup> (CysOMe)  | [N,CO,S]tggg <sub>+</sub>             | 0.0 (0.0)     | 0.0 (0.0)     | 0.0 (0.0)     |
|                             | [N,CO,S]tggg <sub>-</sub>             | 1.7 (2.0)     | 1.8 (2.1)     | 2.3 (2.6)     |
|                             | [S <sup>-</sup> ]tgc <sup>c</sup>     | 20.7 (20.8)   | 21.3 (21.4)   | 24.7 (24.8)   |
|                             | [N,CO]tgtg <sub>-</sub>               | 22.3 (22.6)   | 27.1 (27.4)   | 33.3 (33.6)   |
|                             | [N,CO]tggg                            | 22.9 (23.0)   | 27.4 (27.6)   | 32.8 (33.0)   |
|                             | [N,CO]tcgg                            | 24.9 (25.7)   | 29.6 (30.4)   | 35.5 (36.3)   |
|                             | [N,S]tgtg                             | 27.2 (27.8)   | 29.8 (30.3)   | 37.5 (38.0)   |
|                             | [N,CO]tgtg <sub>+</sub>               | 27.1 (28.2)   | 32.0 (33.1)   | 38.7 (39.7)   |
|                             | [CO,S]ttg <sup>c</sup>                | 28.5 (28.5)   | 29.2 (29.2)   | 33.5 (33.4)   |
|                             | [N,OMe,S]tggg <sub>+</sub>            | 29.5 (29.7)   | 30.4 (30.7)   | 23.2 (23.5)   |
|                             | [N,OMe,S]tggg <sub>-</sub>            | 33.7 (34.1)   | 35.0 (35.4)   | 28.2 (28.6)   |
|                             | [N,CO,S]cggg                          | 40.6 (40.6)   | 39.8 (39.7)   | 41.1 (41.0)   |
|                             | [CO,S]ttgt                            | 56.5 (58.3)   | 62.3 (64.2)   | 78.1 (80.0)   |
|                             | [CO,S]cgg <sup>c</sup>                | 69.3 (69.7)   | 67.8 (68.2)   | 75.3 (75.7)   |
|                             | [CO,S]ctgt                            | 86.2 (87.6)   | 91.2 (92.7)   | 107.9 (109.3) |
|                             | [CO,S]ctgg                            | 89.8 (91.1)   | 94.6 (95.9)   | 112.0 (113.3) |
|                             | [CO]cggg                              | 126.5 (128.2) | 136.9 (138.7) | 153.2 (155.0) |
| [CO,OMe]ggc <sup>c</sup>    | 169.3 (168.3)                         | 158.8 (157.9) | 153.9 (152.9) |               |
| [CO]tgc <sup>c</sup>        | 175.4 (174.9)                         | 166.1 (165.6) | 164.6 (164.1) |               |

<sup>a</sup> Free energies at 298 K given in parentheses. <sup>b</sup> Values are single point energies calculated at the stated level of theory using a 6-311+G(2d,2p) basis set for Zn containing complexes and def2TZVVP for Cd containing complexes. Geometries and vibrational frequencies calculated at B3LYP/6-311+G(d,p) level for Zn containing complexes and B3LYP/def2TZVP for Cd containing complexes. Energies include ZPE corrections scaled by 0.989. <sup>c</sup> Salt-bridge between NH<sub>3</sub><sup>+</sup>, CO<sub>2</sub><sup>-</sup>, and S<sup>-</sup> groups.
